# Supplementary material for: Paracoccidioides brasiliensis Induces α3 Integrin Lysosomal Degradation in Lung Epithelial Cells
Source: MDPI journal article supplement (doi:10.3390/jof9090912), 2023-09-08
Supplement: s1 [file s1]

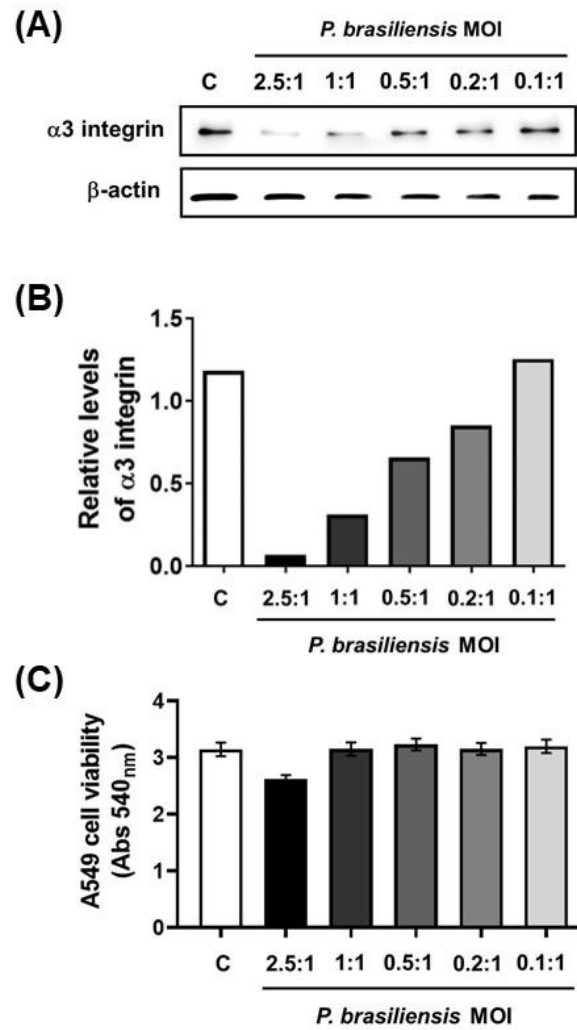

**Figure S1.**  $\alpha 3$  integrin levels in A549 cells infected with different MOIs of *P. brasiliensis*

Different ratios of *P. brasiliensis* yeasts were incubated with A549 epithelial cells for 24 h (MOIs 2.5:1; 1:1; 0.5:1; 0.25:1, and 0.1:1). Control (C) was performed in the absence of yeasts. **(A)** Protein extracts were submitted to SDS-PAGE and  $\alpha 3$  integrin levels were analyzed by Western blot.  $\beta$ -actin was used as loading control. **(B)** Values represent the intensity of the integrin band divided by the intensity of the corresponding  $\beta$ -actin. **(C)** Viability of A549 cells infected with *P. brasiliensis* yeasts was determined by MTT cell viability assay. Similar results were obtained in three independent experiments.

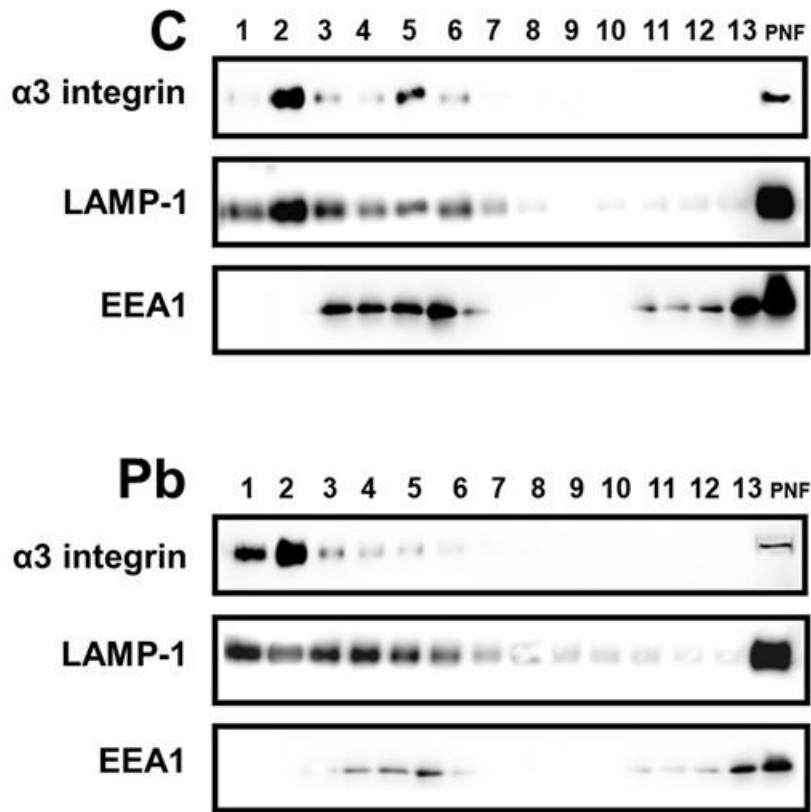

**Figure S2.** Analysis of early and late endosomes in the fractions obtained by sucrose density gradient/ultracentrifugation

A549 cells were incubated in the absence (C) or presence of *P. brasiliensis* yeasts (Pb) for 16 h (MOI 1:1). Then, the cells were collected and lysed. Same amount of protein of the post-nuclear fraction (PNF) was submitted to the sucrose density gradient and, after ultracentrifugation, 13 fractions of 1 mL were collected. Aliquots containing 1 µg of protein from these fractions and 20 µg of PNF were submitted to SDS-PAGE and integrin α3, LAMP-1 (a marker of late endosome/lysosome), and EEA1 (a marker of early endosome) were analyzed by Western blot. Similar results were obtained in three independent experiments.

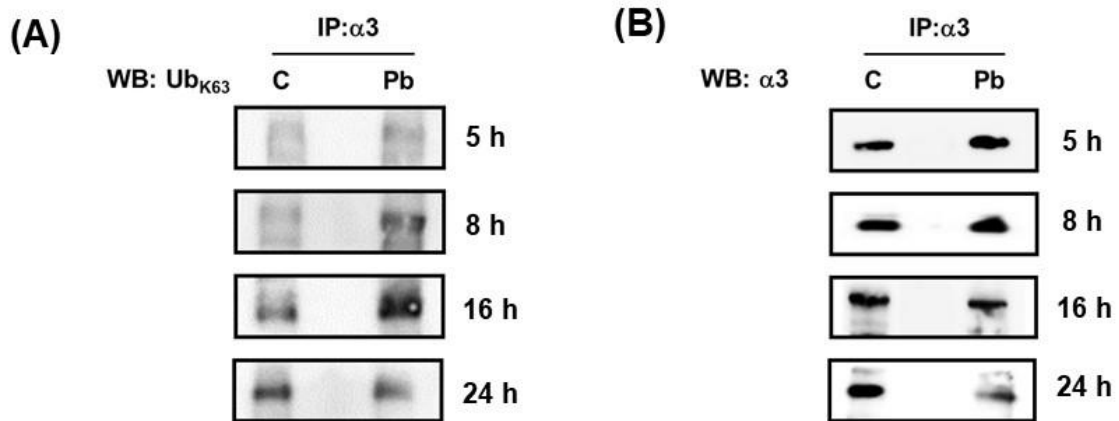

**Figure S3. Analysis of K63-linked ubiquitinated  $\alpha 3$  integrin in A549 epithelial cells infected with *P. brasiliensis* yeasts**

A549 cells were infected with *P. brasiliensis* yeasts (MOI 1:1). After 5, 8, 16, or 24 h, epithelial cells were lysed and aliquots containing 300  $\mu$ g of protein were incubated with anti- $\alpha 3$  integrin antibodies (IP). Then, agarose beads conjugated to A/G protein were added. Immunoprecipitates were analyzed by Western blot (WB), using antibodies (A) anti- UbK63 or (B) anti- $\alpha 3$  integrin. This result is representative of two independent experiments.

Table S1. Primer sequences used in real time quantitative PCR analysis

| Gene        | Sequence (5' → 3')                                                 | Concentration (μM) | Expected PCR product size |
|-------------|--------------------------------------------------------------------|--------------------|---------------------------|
| α3 integrin | Forward: TGCCTACAACTGGAAAGGAAAC<br>Reverse: CTGCCTACCTGCATCGTGTA   | 0.25<br>0.25       | 126 bp                    |
| CHMP3       | Forward: TGATCAGGTCAAGGAAGGCCA<br>Reverse: CACTTTACTGGGTGCTTTGCC   | 0.25<br>0.25       | 166 bp                    |
| β-actin     | Forward: CACCATTGGCAATGAGCGGTTC<br>Reverse: AGGTCTTTGCGGATGTCCACGT | 0.5<br>0.5         | 135 bp                    |
| GAPDH       | Forward: GTCTCCTCTGACTTCAACAGCG<br>Reverse: ACCACCCTGTTGCTGTAGCCAA | 0.25<br>0.12       | 131 bp                    |
